# Supplementary material for: INBIA: a boosting methodology for proteomic network inference
Source: BMC Bioinformatics. 2018 Jul 9;19(Suppl 7):188. doi: 10.1186/s12859-018-2183-5 (PMC6069689; doi:10.1186/s12859-018-2183-5)
Supplement: Supplementary file 2 — PERA PPI gold standard network created from Pathway Commons v2. (XLSX 19 kb) [file 12859_2018_2183_MOESM2_ESM.xlsx]

## Sheet: PERA.cleaned
AKT1	FOXO3
AKT1	CDKN1B
AKT1	BAD
AKT1	AKT1S1
AKT1	CTNNB1
AKT1	GSK3A
AKT1	TSC2
AKT1	RAF1
AKT1	TSC1
AKT1	CDKN1A
AKT1	GAPDH
AKT1	RPTOR
AKT1	TUBA1B
AKT1	ESR1
AKT1	MTOR
AKT1	BCL2L1
YAP1	YWHAB
YAP1	YWHAZ
CCNB1	PCNA
CCNB1	CDKN1B
CCNB1	CDKN1A
CCNB1	CDK1
CCNB1	CCNE1
CCNB1	FOXM1
BAX	BCL2
BAX	BID
BAX	BAK1
BAX	BCL2L1
FOXO3	CCNB1
FOXO3	CTNNB1
FOXO3	CDKN1B
FOXO3	SMAD4
FOXO3	CDKN1A
FOXO3	SMAD3
FOXO3	YWHAE
FOXO3	YWHAB
FOXO3	BCL2L11
FOXO3	YWHAZ
AKT1	BRAF
MAPK1	CCNB1
MAPK1	FOXO3
MAPK1	EIF4EBP1
MAPK1	BAD
MAPK1	MAP2K1
MAPK1	RAF1
MAPK1	BRAF
MAPK1	GAB2
MAPK1	AR
MAPK1	EGFR
MAPK1	LCK
MAPK1	TSC2
MAPK1	CDKN1B
MAPK1	GSK3A
MAPK1	RPS6KA1
MAPK1	SRC
MAPK1	BCL2
MAPK1	TSC1
MAPK1	CDKN1A
MAPK1	ETS1
MAPK1	TP53
MAPK1	SHC1
MAPK1	JUN
MAPK1	RPTOR
MAPK1	SMAD1
MAPK1	NRAS
MAPK1	SMAD3
MAPK1	YWHAE
MAPK1	MYC
MAPK1	YWHAB
MAPK1	PXN
MAPK1	ESR1
MAPK1	RPS6KB1
MAPK1	BCL2L1
MAPK1	MET
MAPK1	NFKB1
MAPK1	BCL2L11
MAPK1	YWHAZ
MAPK1	STAT5A
MAPK1	IRS1
MAPK1	PGR
EIF4G1	RPS6
EIF4G1	EIF4E
EIF4G1	HSPA1A
MAPK1	PRKCA
MAPK1	PRRT2
MAPK1	PRKCD
PRKAA1	CDKN1B
PRKAA1	TSC2
PRKAA1	TSC1
PRKAA1	TP53
PRKAA1	EEF2K
PRKAA1	RPTOR
PRKAA1	ACACA
RPS6	EEF2
RPS6	EIF4E
EIF4EBP1	EIF4E
CDKN1B	YWHAE
CDKN1B	YWHAB
CDKN1B	YWHAZ
BAD	YWHAE
BAD	YWHAB
BAD	YWHAZ
MAPK9	CTNNB1
MAPK9	AR
MAPK9	LCK
MAPK9	SRC
MAPK9	BCL2
MAPK9	TP53
MAPK9	MAPK8
MAPK9	JUN
MAPK9	MYC
MAPK9	BCL2L1
MAPK9	BCL2L11
MAPK9	STAT5A
PIK3CA	AKT1
PIK3CA	MAP2K1
PIK3CA	SYK
PIK3CA	RPS6KB1
PIK3CA	GAB2
PIK3CA	AR
PIK3CA	STAT3
PIK3CA	EGFR
PIK3CA	LCK
PIK3CA	SRC
PIK3CA	ERBB2
PIK3CA	SHC1
PIK3CA	PIK3R1
PIK3CA	CCND1
PIK3CA	NRAS
PIK3CA	YWHAB
PIK3CA	PRKCA
PIK3CA	CDH1
PIK3CA	PRKCD
PIK3CA	PXN
PIK3CA	ESR1
PIK3CA	MTOR
PIK3CA	BCL2L1
PIK3CA	NFKB1
PIK3CA	YWHAZ
PIK3CA	KIT
PIK3CA	ERBB3
PIK3CA	STAT5A
PIK3CA	IRS1
MAP2K1	STAT3
MAP2K1	MAPK14
MAP2K1	STAT5A
MAP2K1	FOXM1
RAF1	MAP2K1
RAF1	BRAF
RAF1	YWHAE
RAF1	YWHAB
RAF1	YWHAZ
AKT1S1	YWHAE
AKT1S1	YWHAB
AKT1S1	YWHAZ
SYK	MAPK1
SYK	MAPK14
SYK	LCK
SYK	FN1
SYK	SRC
SYK	SHC1
SYK	PIK3R1
SYK	TUBA1B
SYK	NFKB1
SYK	STAT5A
RPS6KB1	RPS6
RPS6KB1	EIF4G1
RPS6KB1	AKT1
RPS6KB1	EEF2K
RPS6KB1	PIK3R1
RPS6KB1	PXN
RPS6KB1	MTOR
RPS6KB1	IRS1
CTNNB1	PIK3CA
CTNNB1	AR
CTNNB1	KDR
CTNNB1	EGFR
CTNNB1	MAPK14
CTNNB1	ARID1A
CTNNB1	CDKN1B
CTNNB1	GSK3A
CTNNB1	SRC
CTNNB1	SMAD4
CTNNB1	CDH2
CTNNB1	PIK3R1
CTNNB1	JUN
CTNNB1	DVL3
CTNNB1	CCND1
CTNNB1	SMAD1
CTNNB1	YWHAE
CTNNB1	MYC
CTNNB1	YWHAB
CTNNB1	CDH1
CTNNB1	MET
CTNNB1	YWHAZ
CTNNB1	CDH3
BRAF	MAP2K1
BRAF	NRAS
BRAF	YWHAE
BRAF	YWHAB
BRAF	YWHAZ
GAB2	AKT1
GAB2	MAP2K1
GAB2	LCK
GAB2	SRC
GAB2	EGFR
GAB2	ERBB2
GAB2	SHC1
GAB2	PIK3R1
GAB2	CCND1
GAB2	NRAS
GAB2	PRKCA
GAB2	MET
GAB2	KIT
GAB2	ERBB3
GAB2	STAT5A
AR	LCK
AR	SRC
AR	SMAD4
AR	PIK3R1
AR	PRDX1
AR	CCND1
AR	SMAD3
AR	ESR1
AR	PGR
KDR	PIK3CA
KDR	GAB2
KDR	MAPK14
KDR	LCK
KDR	SRC
KDR	PIK3R1
STAT3	FOXO3
STAT3	LCK
STAT3	SRC
STAT3	BCL2
STAT3	GATA3
STAT3	CDKN1A
STAT3	CCND1
STAT3	CCNE1
STAT3	YWHAE
STAT3	MYC
STAT3	YWHAB
STAT3	BCL2L1
STAT3	YWHAZ
STAT3	KIT
STAT3	STAT5A
EGFR	STAT3
EGFR	LCK
EGFR	CAV1
EGFR	SRC
EGFR	ERBB2
EGFR	SHC1
EGFR	PIK3R1
EGFR	NRAS
EGFR	CDH1
EGFR	PXN
EGFR	MTOR
MAPK14	FOXO3
MAPK14	AR
MAPK14	STAT3
MAPK14	TSC2
MAPK14	BCL2
MAPK14	EGFR
MAPK14	CDKN1A
MAPK14	TP53
MAPK14	CDH2
MAPK14	EIF4E
MAPK14	JUN
MAPK14	MYC
MAPK14	PXN
MAPK14	ESR1
MAPK14	NFKB1
MAPK14	YWHAZ
MAPK14	STAT5A
ATM	BRCA2
ATM	RAD50
ATM	BID
ATM	CHEK1
ATM	TP53
ATM	CHEK2
ATM	MRE11
ATM	RAD51
ATM	TP53BP1
BRCA2	RAD51
ACVRL1	CAV1
ACVRL1	SMAD1
ACVRL1	NRAS
ACVRL1	SMAD3
PCNA	CCNE2
PCNA	CDK1
PCNA	CCNE1
PCNA	RAD51
PCNA	ESR1
ARID1A	SMAD4
ARID1A	CCND1
ARID1A	SMAD1
ARID1A	MYC
GSK3A	MYC
LCK	PECAM1
LCK	MAP2K1
LCK	CTNNB1
LCK	MAPK14
LCK	FN1
LCK	PTEN
LCK	SRC
LCK	AKT1
LCK	MAPK8
LCK	NRG1
LCK	SHC1
LCK	PIK3R1
LCK	PRDX1
LCK	CCND1
LCK	NRAS
LCK	MYC
LCK	TUBA1B
LCK	PRRT2
LCK	CDH1
LCK	PRKCD
LCK	PXN
LCK	ESR1
LCK	BCL2L1
LCK	MET
LCK	NFKB1
LCK	KIT
LCK	STAT5A
LCK	IRS1
TSC2	TSC1
TSC2	YWHAE
TSC2	YWHAB
TSC2	MTOR
TSC2	YWHAZ
TSC2	RICTOR
CDKN1B	PCNA
CDKN1B	CCNE2
CDKN1B	CDKN1A
CDKN1B	CDK1
CDKN1B	CCND1
CDKN1B	CCNE1
CAV1	FN1
CAV1	COL6A1
CAV1	SMAD1
CAV1	SMAD3
CAV1	TUBA1B
CAV1	ITGA2
RAF1	SRC
RAF1	NRAS
RAF1	MYC
RAD50	CHEK2
RAD50	MRE11
RAD50	TP53BP1
GSK3A	BAX
GSK3A	SYK
GSK3A	LCK
GSK3A	TSC2
GSK3A	PTEN
GSK3A	SRC
GSK3A	TSC1
GSK3A	CDKN1A
GSK3A	TP53
GSK3A	DVL3
GSK3A	CCND1
GSK3A	SMAD1
GSK3A	CCNE1
GSK3A	VHL
GSK3A	ESR1
CCNE2	CDKN1A
CCNE2	CDK1
CCNE2	CCNE1
FN1	SRC
FN1	SERPINE1
FN1	COL6A1
FN1	YWHAE
FN1	TUBA1B
FN1	YWHAB
FN1	PXN
FN1	ITGA2
FN1	YWHAZ
FN1	IRS1
RPS6KA1	RPS6
RPS6KA1	TSC2
RPS6KA1	GSK3A
RPS6KA1	TSC1
RPS6KA1	YBX1
RPS6KA1	EEF2K
RPS6KA1	RPTOR
RPS6KA1	ESR1
RPS6KA1	RPS6KB1
MYH11	TUBA1B
MYH11	PXN
TUBA1B	CDK1
TUBA1B	YWHAE
SRC	PECAM1
SRC	MAP2K1
SRC	MAPK14
SRC	CDKN1B
SRC	CAV1
SRC	AKT1
SRC	MAPK8
SRC	GAPDH
SRC	CDH2
SRC	NRG1
SRC	ERBB2
SRC	SHC1
SRC	CDK1
SRC	PIK3R1
SRC	NRAS
SRC	TUBA1B
SRC	CDH1
SRC	PRKCD
SRC	PXN
SRC	ESR1
SRC	MET
SRC	NFKB1
SRC	KIT
SRC	ERBB3
SRC	ANXA1
SRC	STAT5A
SRC	CDH3
SRC	G6PD
BCL2	BAD
BCL2	BID
BCL2	TP53
BCL2	BAK1
BCL2	YWHAE
BCL2	YWHAB
BCL2	BCL2L1
BCL2	BCL2L11
BCL2	YWHAZ
BID	BAK1
BID	BCL2L1
BID	BCL2L11
SRSF1	YBX1
TSC1	YWHAE
TSC1	YWHAB
TSC1	MTOR
TSC1	YWHAZ
TSC1	RICTOR
EGFR	AKT1
EGFR	PCNA
EGFR	CDH2
EGFR	NRG1
EGFR	PRKCA
EGFR	ERBB3
EGFR	ANXA1
EGFR	STAT5A
EGFR	CDH3
SMAD4	SERPINE1
SMAD4	GATA3
SMAD4	CDKN1A
SMAD4	CCND1
SMAD4	SMAD1
SMAD4	SMAD3
SMAD4	MYC
SMAD4	ESR1
SMAD4	STK11
SMAD4	WWTR1
AKT1	EIF4EBP1
AKT1	BCL2
AKT1	YWHAE
AKT1	MYC
AKT1	YWHAB
AKT1	YWHAZ
GATA3	SMAD3
CDKN1A	PCNA
CDKN1A	CDK1
CDKN1A	CCND1
CDKN1A	CCNE1
COL6A1	PXN
COL6A1	ITGA2
CHEK1	BRCA2
CHEK1	CHEK2
CHEK1	RAD51
ETS1	KDR
ETS1	CCND1
ETS1	KIT
TP53	CCNB1
TP53	BAX
TP53	PIK3CA
TP53	PCNA
TP53	TSC2
TP53	CDKN1B
TP53	CAV1
TP53	PTEN
TP53	BID
TP53	SERPINE1
TP53	EGFR
TP53	CDKN1A
TP53	BAK1
TP53	HSPA1A
TP53	BCL2L1
TP53	BCL2L11
TP53	XRCC5
CHEK1	TP53
CHEK1	KIT
CHEK1	FOXM1
MAPK8	BAX
MAPK8	AR
MAPK8	TP53
MAPK8	JUN
MAPK8	BCL2L11
CDH2	PIK3CA
CDH2	PIK3R1
CDH2	CDH1
CDH2	CDH3
NRG1	MAPK1
NRG1	PIK3CA
NRG1	MAP2K1
NRG1	STAT3
NRG1	MAPK8
NRG1	ERBB2
NRG1	SHC1
NRG1	PIK3R1
NRG1	NRAS
NRG1	ERBB3
NRG1	STAT5A
ERBB2	AKT1
ERBB2	MAP2K1
ERBB2	CTNNB1
ERBB2	MAPK8
ERBB2	CDH2
ERBB2	CDK1
ERBB2	PIK3R1
ERBB2	NRAS
ERBB2	PRKCA
ERBB2	CDH1
ERBB2	ERBB3
ERBB2	STAT5A
ERBB2	CDH3
SHC1	MAP2K1
SHC1	PIK3R1
SHC1	NRAS
SHC1	TUBA1B
SHC1	PRKCD
SHC1	ESR1
SHC1	MTOR
SHC1	MET
SHC1	IRS1
NOTCH1	CTNNB1
NOTCH1	GATA3
NOTCH1	CDKN1A
NOTCH1	DVL3
NOTCH1	CCND1
NOTCH1	MYC
CDK1	EIF4EBP1
CDK1	SQSTM1
CDK1	MAP2K1
CDK1	AR
CDK1	BCL2
CDK1	TSC1
CDK1	EGFR
CDK1	TP53
CDK1	CHEK1
CDK1	EEF2K
CDK1	RPTOR
CDK1	PRDX1
CDK1	RB1
CDK1	CCNE1
CDK1	YWHAE
CDK1	STMN1
CDK1	RPS6KB1
CDK1	BCL2L11
CDK1	FOXM1
PIK3R1	AKT1
PIK3R1	MAP2K1
PIK3R1	STAT3
PIK3R1	CCND1
PIK3R1	NRAS
PIK3R1	YWHAB
PIK3R1	PRKCA
PIK3R1	CDH1
PIK3R1	PRKCD
PIK3R1	PXN
PIK3R1	ESR1
PIK3R1	MTOR
PIK3R1	BCL2L1
PIK3R1	NFKB1
PIK3R1	YWHAZ
PIK3R1	KIT
PIK3R1	ERBB3
PIK3R1	STAT5A
PIK3R1	IRS1
JUN	ETS1
JUN	TP53
JUN	CDK1
JUN	CCND1
JUN	CCNE1
JUN	MYC
JUN	ESR1
JUN	BCL2L1
JUN	BCL2L11
RPTOR	EIF4EBP1
RPTOR	AKT1S1
RPTOR	RPS6KB1
RPTOR	EIF4E
RPTOR	YWHAE
RPTOR	YWHAB
RPTOR	MTOR
RPTOR	YWHAZ
RPTOR	IRS1
DVL3	MYC
CCND1	FOXM1
SMAD1	CCND1
SMAD1	SMAD3
SMAD1	MYC
XBP1	GSK3A
XBP1	TUBA1B
NRAS	MAP2K1
NRAS	YWHAE
NRAS	YWHAB
NRAS	YWHAZ
CCNE1	TP53
CCNE1	RB1
CCNE1	FOXM1
MAP2K1	GSK3A
MAP2K1	YWHAE
MAP2K1	YWHAB
MAP2K1	YWHAZ
SMAD3	SERPINE1
SMAD3	CDKN1A
SMAD3	MYC
SMAD3	ESR1
SMAD3	WWTR1
YWHAE	CHEK1
YWHAE	YWHAB
YWHAE	PXN
YWHAE	MTOR
YWHAE	BCL2L1
YWHAE	YWHAZ
YWHAE	WWTR1
PRKCA	RAF1
PRKCA	BRAF
PRKCA	LCK
PRKCA	SRC
PRKCA	TP53
PRKCA	YWHAE
PRKCA	PRRT2
PRKCA	YWHAB
PRKCA	PRKCD
PRKCA	NFKB1
PRKCA	YWHAZ
MYC	CCNB1
MYC	BAX
MYC	PCNA
MYC	TSC2
MYC	EIF4G1
MYC	CDKN1B
MYC	BCL2
MYC	CDKN1A
MYC	TP53
MYC	GAPDH
MYC	ERBB2
MYC	EIF4E
MYC	CDK1
MYC	CCND1
MYC	CCNE1
MYC	BCL2L1
MYC	TFRC
TUBA1B	PXN
CHEK2	TP53
CHEK2	VHL
CHEK2	XRCC1
CHEK2	FOXM1
PRRT2	MAPK9
PRRT2	RAF1
PRRT2	BRAF
PRRT2	SRC
PRRT2	TP53
PRRT2	MAPK8
PRRT2	PRKCD
PRRT2	NFKB1
YWHAB	BID
YWHAB	CHEK1
YWHAB	PXN
YWHAB	MTOR
YWHAB	BCL2L1
YWHAB	BCL2L11
YWHAB	YWHAZ
PRKCA	AR
PRKCA	GSK3A
PRKCA	BCL2
PRKCA	AKT1
PRKCA	CDKN1A
PRKCA	TUBA1B
PRKCA	KIT
PRKCA	TFRC
PRKCA	ANXA1
CDH1	MET
CDH1	CDH3
PRKCD	MAP2K1
PRKCD	RAF1
PRKCD	STAT3
PRKCD	TP53
PRKCD	NFKB1
PXN	ITGA2
PXN	YWHAZ
MRE11	CHEK2
MRE11	TP53BP1
ESR1	CCND1
ESR1	XBP1
ESR1	MYC
ESR1	STK11
ESR1	PGR
BIRC2	CASP7
RPS6KB1	RICTOR
RPS6KB1	GSK3A
RPS6KB1	PDCD4
RPS6KB1	ESR1
AKT1	YAP1
AKT1	AR
AKT1	CHEK1
AKT1	YBX1
AKT1	PDCD4
AKT1	PEA15
AKT1	BCL2L11
AKT1	IRS1
MAPK8	CTNNB1
MTOR	EIF4EBP1
MTOR	AKT1S1
MTOR	STAT3
MTOR	BCL2
MTOR	EEF2K
MTOR	EIF4E
MTOR	MYC
MTOR	PRKCA
MTOR	NFKB1
MTOR	YWHAZ
MTOR	RICTOR
MTOR	STAT5A
MTOR	IRS1
BCL2L1	BAD
BCL2L1	BAK1
BCL2L1	BCL2L11
BCL2L1	YWHAZ
MET	PIK3CA
MET	MAPK8
MET	CDH2
MET	PIK3R1
BCL2L11	BAX
BCL2L11	BAK1
YWHAZ	CCNB1
YWHAZ	BID
YWHAZ	CHEK1
YWHAZ	CDK1
YWHAZ	BCL2L11
KIT	RPS6KB1
KIT	MAPK8
KIT	NRAS
KIT	STAT5A
RICTOR	AKT1
RICTOR	PRKCA
ERBB3	AKT1
ERBB3	MAP2K1
ERBB3	CTNNB1
ERBB3	MAPK8
ERBB3	CDH2
ERBB3	NRAS
ERBB3	PRKCA
ERBB3	CDH1
ERBB3	STAT5A
ERBB3	CDH3
STAT5A	AKT1
STAT5A	FOXO3
STAT5A	BCL2
STAT5A	GATA3
STAT5A	CDKN1A
STAT5A	CCND1
STAT5A	NRAS
STAT5A	CCNE1
STAT5A	YWHAE
STAT5A	MYC
STAT5A	YWHAB
STAT5A	PRKCA
STAT5A	ESR1
STAT5A	BCL2L1
STAT5A	YWHAZ
STK11	PRKAA1
STK11	PTEN
STK11	TP53
STK11	MYC
TP53BP1	CHEK2
FOXM1	BRCA2
FOXM1	MYC
FOXM1	XRCC1
FOXM1	ESR1
FOXM1	HSPA1A
IRS1	CAV1
IRS1	NRAS
IRS1	PRKCD
IRS1	PXN
WWTR1	SERPINE1
