# Supplementary material for: INBIA: a boosting methodology for proteomic network inference
Source: BMC Bioinformatics. 2018 Jul 9;19(Suppl 7):188. doi: 10.1186/s12859-018-2183-5 (PMC6069689; doi:10.1186/s12859-018-2183-5)
Supplement: Supplementary file 3 — Inferred PPIs network statistics and p-values computed with Wilcoxon rank-sum test for each cancer type. (XLSX 14.9 kb) [file 12859_2018_2183_MOESM3_ESM.xlsx]

## Sheet: Foglio1
INBIA		PERA
BLCA		BLCA			p-value = 0.375
Edge density	0.0670263	Edge density	0.0440292
Transitivity	0.196303	Transitivity	0.191848
Diameter	5	Diameter	8
Degree centrality	0.216662	Degree centrality	0.153888
Closeness centrality	0.286441	Closeness centrality	0.0902132
Betweenness centrality	0.101622	Betweenness centrality	0.122377
Mean distance	2.50834	Mean distance	3.51881
BRCA		BRCA			p-value = 0.375
Edge density	0.0468425	Edge density	0.0496805		0.0468425	0.147191	6	0.243234	0.346072	0.191915	2.7437
Transitivity	0.147191	Transitivity	0.204283		0.0496805	0.204283	9	0.22583	0.0725368	0.196782	3.15428
Diameter	6	Diameter	9
Degree centrality	0.243234	Degree centrality	0.22583
Closeness centrality	0.346072	Closeness centrality	0.0725368
Betweenness centrality	0.191915	Betweenness centrality	0.196782
Mean distance	2.7437	Mean distance	3.15428
COAD		COAD			p-value = 0.4688
Edge density	0.0656278	Edge density	0.0472111
Transitivity	0.199939	Transitivity	0.145938
Diameter	5	Diameter	7		0.0656278	0.199939	5	0.246429	0.304405	0.129208	2.52133
Degree centrality	0.246429	Degree centrality	0.217495		0.0472111	0.145938	7	0.217495	0.307354	0.238328	3.13764
Closeness centrality	0.304405	Closeness centrality	0.307354
Betweenness centrality	0.129208	Betweenness centrality	0.238328
Mean distance	2.52133	Mean distance	3.13764
GBM		GBM			p-value = 0.675
Edge density	0.0472921	Edge density	0.0503663
Transitivity	0.15633	Transitivity	0.205825
Diameter	6	Diameter	6
Degree centrality	0.224638	Degree centrality	0.266941		0.0472921	0.15633	6	0.224638	0.107646	0.215757	2.845
Closeness centrality	0.107646	Closeness centrality	0.0272417		0.0503663	0.205825	6	0.266941	0.0272417	0.184926	2.77756
Betweenness centrality	0.215757	Betweenness centrality	0.184926
Mean distance	2.845	Mean distance	2.77756
HNSC		HNSC			p-value = 0.4017
Edge density	0.044403	Edge density	0.0558225
Transitivity	0.156848	Transitivity	0.191441
Diameter	6	Diameter	6		0.044403	0.156848	6	0.212234	0.0967821	0.191762	2.90815
Degree centrality	0.212234	Degree centrality	0.342027		0.0558225	0.191441	6	0.342027	0.113964	0.258205	2.76117
Closeness centrality	0.0967821	Closeness centrality	0.113964
Betweenness centrality	0.191762	Betweenness centrality	0.258205
Mean distance	2.90815	Mean distance	2.76117
KIRC		KIRC			p-value = 0.4017
Edge density	0.0428375	Edge density	0.0513158
Transitivity	0.150108	Transitivity	0.168067
Diameter	6	Diameter	7		0.0428375	0.150108	6	0.173829	0.09916	0.135494	3.01267
Degree centrality	0.173829	Degree centrality	0.253947		0.0513158	0.168067	7	0.253947	0.111133	0.244175	2.92795
Closeness centrality	0.09916	Closeness centrality	0.111133
Betweenness centrality	0.135494	Betweenness centrality	0.244175
Mean distance	3.01267	Mean distance	2.92795
LGG		LGG			p-value = 1
Edge density	0.0496817	Edge density	0.0548917
Transitivity	0.16387	Transitivity	0.219742
Diameter	6	Diameter	6		0.0496817	0.16387	6	0.215805	0.101739	0.220757	2.82451
Degree centrality	0.215805	Degree centrality	0.23637		0.0548917	0.219742	6	0.23637	0.0443149	0.185753	2.83316
Closeness centrality	0.101739	Closeness centrality	0.0443149
Betweenness centrality	0.220757	Betweenness centrality	0.185753
Mean distance	2.82451	Mean distance	2.83316
LUAD		LUAD			p-value = 0.2188
Edge density	0.0702228	Edge density	0.0625694
Transitivity	0.200416	Transitivity	0.300216
Diameter	5	Diameter	7		0.0702228	0.200416	5	0.248926	0.31061	0.109626	2.47058
Degree centrality	0.248926	Degree centrality	0.279896		0.0625694	0.300216	7	0.279896	0.0710836	0.338072	3.16136
Closeness centrality	0.31061	Closeness centrality	0.0710836
Betweenness centrality	0.109626	Betweenness centrality	0.338072
Mean distance	2.47058	Mean distance	3.16136
LUSC		LUSC			p-value = 0.2969
Edge density	0.0650738	Edge density	0.0486501
Transitivity	0.210158	Transitivity	0.304749
Diameter	5	Diameter	8		0.0650738	0.210158	5	0.249611	0.313441	0.10739	2.54613
Degree centrality	0.249611	Degree centrality	0.253675		0.0486501	0.304749	8	0.253675	0.0295223	0.2165	3.22825
Closeness centrality	0.313441	Closeness centrality	0.0295223
Betweenness centrality	0.10739	Betweenness centrality	0.2165
Mean distance	2.54613	Mean distance	3.22825
OV		OV			p-value = 0.1563
Edge density	0.0521628	Edge density	0.0560396
Transitivity	0.150169	Transitivity	0.185236
Diameter	7	Diameter	9		0.0521628	0.150169	7	0.215013	0.299384	0.124943	2.71918
Degree centrality	0.215013	Degree centrality	0.27396		0.0560396	0.185236	9	0.27396	0.107511	0.244787	3.02391
Closeness centrality	0.299384	Closeness centrality	0.107511
Betweenness centrality	0.124943	Betweenness centrality	0.244787
Mean distance	2.71918	Mean distance	3.02391
PRAD		PRAD			p-value = 0.4688
Edge density	0.0644911	Edge density	0.048163
Transitivity	0.197111	Transitivity	0.175887		0.0644911	0.197111	6	0.236208	0.295519	0.115161	2.55886
Diameter	6	Diameter	8		0.048163	0.175887	8	0.196935	0.297885	0.214819	3.21112
Degree centrality	0.236208	Degree centrality	0.196935
Closeness centrality	0.295519	Closeness centrality	0.297885
Betweenness centrality	0.115161	Betweenness centrality	0.214819
Mean distance	2.55886	Mean distance	3.21112
READ		READ			p-value = 0.2188
Edge density	0.0648084	Edge density	0.0745035
Transitivity	0.182904	Transitivity	0.258602
Diameter	5	Diameter	6		0.0648084	0.182904	5	0.245051	0.297683	0.113238	2.5296
Degree centrality	0.245051	Degree centrality	0.245169		0.0745035	0.258602	6	0.245169	0.0923406	0.128997	2.61038
Closeness centrality	0.297683	Closeness centrality	0.0923406
Betweenness centrality	0.113238	Betweenness centrality	0.128997
Mean distance	2.5296	Mean distance	2.61038
SKCM		SKCM			p-value = 0.4688
Edge density	0.0652681	Edge density	0.0551349
Transitivity	0.190169	Transitivity	0.237699		0.0652681	0.190169	6	0.249417	0.327188	0.1369	2.50146
Diameter	6	Diameter	7		0.0551349	0.237699	7	0.212192	0.097055	0.170387	2.92971
Degree centrality	0.249417	Degree centrality	0.212192
Closeness centrality	0.327188	Closeness centrality	0.097055
Betweenness centrality	0.1369	Betweenness centrality	0.170387
Mean distance	2.50146	Mean distance	2.92971
STAD		STAD			p-value = 0.01563
Edge density	0.0451503	Edge density	0.0502815
Transitivity	0.135871	Transitivity	0.182455
Diameter	6	Diameter	9		0.0451503	0.135871	6	0.209087	0.302516	0.175673	2.94146
Degree centrality	0.209087	Degree centrality	0.246748		0.0502815	0.182455	9	0.246748	0.324504	0.306333	3.17472
Closeness centrality	0.302516	Closeness centrality	0.324504
Betweenness centrality	0.175673	Betweenness centrality	0.306333
Mean distance	2.94146	Mean distance	3.17472
THCA		THCA			p-value = 0.2188
Edge density	0.044032	Edge density	0.0529293
Transitivity	0.144365	Transitivity	0.189776
Diameter	7	Diameter	8		0.044032	0.144365	7	0.195637	0.292251	0.16414	2.95163
Degree centrality	0.195637	Degree centrality	0.260202		0.0529293	0.189776	8	0.260202	0.102	0.230534	2.9716
Closeness centrality	0.292251	Closeness centrality	0.102
Betweenness centrality	0.16414	Betweenness centrality	0.230534
Mean distance	2.95163	Mean distance	2.9716
UCEC		UCEC			p-value = 0.375
Edge density	0.0455182	Edge density	0.0449561
Transitivity	0.136946	Transitivity	0.185047
Diameter	6	Diameter	9		0.0455182	0.136946	6	0.240196	0.330071	0.232514	2.88698
Degree centrality	0.240196	Degree centrality	0.228728		0.0449561	0.185047	9	0.228728	0.102919	0.257651	3.32045
Closeness centrality	0.330071	Closeness centrality	0.102919
Betweenness centrality	0.232514	Betweenness centrality	0.257651
Mean distance	2.88698	Mean distance	3.32045
