# Supplementary material for: INBIA: a boosting methodology for proteomic network inference
Source: BMC Bioinformatics. 2018 Jul 9;19(Suppl 7):188. doi: 10.1186/s12859-018-2183-5 (PMC6069689; doi:10.1186/s12859-018-2183-5)
Supplement: Supplementary file 4 — Methods and cancers consensus PPI networks for INBIA and PERA. (XLSX 15.4 kb) [file 12859_2018_2183_MOESM4_ESM.xlsx]

## Sheet: ALL.METHODS
tissue	n	proteins	predictions
BLCA	12	SRC,MAPK1,RPS6KB1,MTOR,NFKB1,CCNE2,PARK7,SMAD3,SHC1,MAP2K1,MSH6,EIF4EBP1,AKT1,PRKAA1,BAD,BAK1,BCL2,EGFR,GSK3A,MSH2	SRC-EIF4EBP1, MAPK1-AKT1, RPS6KB1-AKT1, MTOR-PRKAA1, NFKB1-BAD, CCNE2-BAK1, PARK7-BCL2, SMAD3-CCNE2, SHC1-EGFR, MAP2K1-MAPK1, SRC-GSK3A, MSH6-MSH2
BRCA	77	DIRAS3,NRAS,BAP1,TSC2,FASN,MAPK1,MTOR,AKT1S1,LCK,PRKCA,RAB11A,EIF4G1,MAPK14,BCL2L11,PARK7,CDKN1B,MRE11,PRKCD,XBP1,CDH1,CDH2,STMN1,PECAM1,CHEK2,COL6A1,MYH11,RBM15,SRC,ETS1,TP53,FOXM1,PCNA,PEA15,GAPDH,GSK3A,ERBB2,ERBB3,SHC1,NFKB1,GATA3,PREX1,MAP2K1,YBX1,CDKN1A,NF2,RPTOR,COPS5,PIK3R1,SYK,MSH6,YAP1,YWHAB,TP53BP1,ACACA,ACVRL1,AKT1,ANXA1,BRAF,BAD,BCL2,BECN1,CTNNB1,BID,MET,MYC,CASP7,CAV1,MS4A1,CHEK1,CCN…	DIRAS3-YWHAB, NRAS-YWHAB, BAP1-TP53BP1, TSC2-TP53BP1, FASN-ACACA, DIRAS3-ACVRL1, NRAS-ACVRL1, MAPK1-AKT1, MTOR-AKT1, AKT1S1-AKT1, TSC2-AKT1, LCK-ANXA1, PRKCA-ANXA1, RAB11A-DIRAS3, EIF4G1-BRAF, MAPK14-BAD, BCL2L11-BCL2, PARK7-BCL2, CDKN1B-BCL2, MRE11-BECN1, PRKCD-BECN1, XBP1-BECN1, CDH1-CTNNB1, CDH2-BID, RAB11A-BID, STMN1-BID, PECAM1-MET, CHEK2-MET, XBP1-MYC, LCK-CASP7, COL6A1-CAV1, MYH11-CAV1, RA…
COAD	52	PARK7,AKT1,CAV1,GSK3A,RB1,RICTOR,RPS6,XRCC5,SRC,TSC2,ANXA7,CHEK2,FN1,COPS5,EIF4G1,NFKB1,BID,FOXM1,CDH1,COL6A1,PEA15,ERBB2,SHC1,PGR,MAPK8,MAP2K1,MAPK14,SCD,SRSF1,WWTR1,YBX1,PTEN,PRKCD,MSH6,YWHAZ,EIF4EBP1,TP53BP1,ACACA,ANXA1,DIRAS3,ARID1A,BAD,BAK1,BAP1,CTNNB1,CCNB1,EEF2,EGFR,ESR1,MAPK1,ETS1,GAB2,MTOR,NRAS,CDKN1A,PIK3R1,PRKCA,MSH2	PARK7-YWHAZ, AKT1-EIF4EBP1, CAV1-EIF4EBP1, GSK3A-EIF4EBP1, RB1-EIF4EBP1, RICTOR-EIF4EBP1, RPS6-EIF4EBP1, XRCC5-TP53BP1, RPS6-ACACA, GSK3A-AKT1, SRC-AKT1, TSC2-AKT1, ANXA7-ANXA1, CHEK2-ANXA1, FN1-ANXA1, COPS5-DIRAS3, EIF4G1-ARID1A, NFKB1-BAD, BID-BAK1, EIF4G1-BAP1, FOXM1-BAP1, XRCC5-BAP1, CDH1-CTNNB1, COL6A1-CAV1, RICTOR-CAV1, XRCC5-CHEK2, FOXM1-CCNB1, RB1-CCNB1, PEA15-EEF2, ERBB2-EGFR, SHC1-EGFR,…
GBM	19	DIRAS3,CHEK2,RB1,SMAD4,YAP1,FOXM1,ERBB2,MAP2K1,PEA15,YBX1,CDKN1A,MSH2,GSK3A,RPS6KB1,RAB11A,TSC2,STAT5A,PTEN,YWHAB,EIF4EBP1,PECAM1,CDK1,CCNB1,EGFR,MAPK1,FN1,GAB2,MTOR,MAPK14,PIK3R1	DIRAS3-YWHAB, CHEK2-EIF4EBP1, RB1-EIF4EBP1, SMAD4-PECAM1, YAP1-CDK1, FOXM1-CCNB1, ERBB2-EGFR, MAP2K1-MAPK1, PEA15-MAPK1, YBX1-MAPK1, CDKN1A-FN1, MSH2-FOXM1, GSK3A-GAB2, RPS6KB1-GSK3A, YBX1-MAP2K1, RAB11A-MTOR, TSC2-MTOR, STAT5A-MAPK14, PTEN-PIK3R1
HNSC	17	CDK1,TSC2,MSH6,GSK3A,PEA15,BCL2L11,RPTOR,PIK3CA,MAPK1,ERBB2,MAP2K1,SRC,RAD50,RBM15,RPS6,AKT1,PRKAA1,BAP1,BAX,BCL2,RAF1,DVL3,EEF2,EGFR,MYH11,RPS6KB1,MSH2	CDK1-AKT1, TSC2-AKT1, CDK1-PRKAA1, MSH6-BAP1, GSK3A-BAX, PEA15-BAX, BCL2L11-BCL2, RPTOR-RAF1, PIK3CA-DVL3, MAPK1-EEF2, ERBB2-EGFR, MAP2K1-MAPK1, SRC-ERBB2, RAD50-MYH11, RBM15-RPS6KB1, RPS6-RBM15, MSH6-MSH2
KIRC	57	PEA15,PRDX1,RPS6,FASN,DIRAS3,MAPK1,PTEN,TSC2,GAPDH,RBM15,YBX1,BRCA2,MS4A1,CDKN1B,TP53,MRE11,RAB25,GSK3A,ERBB3,ETS1,XBP1,RPS6KB1,RAB11A,STMN1,TFRC,ERBB2,SHC1,MAP2K1,SRC,RPTOR,CDKN1A,ERRFI1,MTOR,PIK3R1,RICTOR,STAT5A,YAP1,PREX1,PRKCD,SYK,MSH6,YWHAZ,EIF4EBP1,ACACA,ACVRL1,AKT1,PRKAA1,ATM,BAD,BAK1,BCL2,BECN1,BID,KIT,MET,MYC,RAF1,PECAM1,CHEK1,CCNB1,EGFR,FN1,GAB2,LCK,MYH11,NFKB1,MAPK14,PRKCA,MSH2	PEA15-YWHAZ, PRDX1-YWHAZ, RPS6-EIF4EBP1, FASN-ACACA, DIRAS3-ACVRL1, MAPK1-AKT1, PTEN-AKT1, TSC2-AKT1, GAPDH-PRKAA1, PTEN-PRKAA1, RBM15-ATM, YBX1-BAD, BRCA2-BAK1, MS4A1-BAK1, CDKN1B-BCL2, TP53-BECN1, YBX1-BECN1, MRE11-BID, RAB25-BRCA2, GSK3A-KIT, ERBB3-MET, ETS1-MYC, XBP1-MYC, MAPK1-RAF1, RPS6KB1-RAF1, RAB11A-PECAM1, STMN1-CHEK1, TFRC-CCNB1, ERBB2-EGFR, SHC1-EGFR, GSK3A-MAPK1, MAP2K1-MAPK1, SHC1-M…
LGG	32	YWHAZ,CDH3,RAB25,MAPK8,FASN,TSC2,GSK3A,MAP2K1,RICTOR,RAD50,HSPA1A,ESR1,TIGAR,FOXM1,PRKCD,ERBB2,MAPK14,PDCD4,PEA15,RAD51,RB1,RBM15,RPTOR,XBP1,MSH6,YWHAB,YWHAE,EIF4EBP1,ACACA,AKT1,ATM,BRAF,BID,PECAM1,CDK1,CCNB1,CCND1,EGFR,MAPK1,ETS1,GATA3,XRCC5,MTOR,NDRG1,MSH2	YWHAZ-YWHAB, CDH3-YWHAE, RAB25-YWHAE, MAPK8-EIF4EBP1, FASN-ACACA, TSC2-ACACA, GSK3A-AKT1, MAP2K1-AKT1, RICTOR-AKT1, TSC2-AKT1, RAD50-ATM, MAP2K1-BRAF, HSPA1A-BID, ESR1-PECAM1, TIGAR-CDK1, FOXM1-CCNB1, PRKCD-CCND1, ERBB2-EGFR, GSK3A-ESR1, MAPK14-MAPK1, PDCD4-MAPK1, PEA15-MAPK1, RAD51-MAPK1, PEA15-ETS1, RAD51-ETS1, CDH3-GATA3, TSC2-GSK3A, RB1-MAPK8, RBM15-XRCC5, RPTOR-MTOR, XBP1-NDRG1, MSH6-MSH2
LUAD	23	AKT1,RPS6,ATM,BRAF,AKT1S1,RICTOR,TSC2,CDH1,MS4A1,MAP2K1,FOXM1,CDKN1B,PREX1,ERBB2,PEA15,PDK1,SRC,CDH2,MSH6,EIF4EBP1,CTNNB1,MYC,RAF1,CCNB1,CCNE2,EGFR,MAPK1,ETS1,GSK3A,HSPA1A,LCK,MTOR,MYH11,MSH2	AKT1-EIF4EBP1, RPS6-EIF4EBP1, ATM-AKT1, BRAF-AKT1, AKT1S1-AKT1, RICTOR-AKT1, TSC2-AKT1, CDH1-CTNNB1, MS4A1-MYC, MAP2K1-RAF1, FOXM1-CCNB1, CDKN1B-CCNE2, PREX1-CDH1, ERBB2-EGFR, MAP2K1-MAPK1, PEA15-ETS1, PDK1-GSK3A, SRC-ERBB2, CDH2-HSPA1A, PREX1-LCK, TSC2-MTOR, RICTOR-MYH11, MSH6-MSH2
LUSC	13	COPS5,CHEK1,MAPK1,CTNNB1,BCL2L11,ERBB3,GSK3A,MAP2K1,MTOR,PDK1,STMN1,RPS6,MSH6,YWHAE,EIF4EBP1,AKT1,BRAF,BCL2,MRE11,MSH2	COPS5-YWHAE, CHEK1-EIF4EBP1, MAPK1-AKT1, CTNNB1-BRAF, BCL2L11-BCL2, ERBB3-CHEK1, GSK3A-MAPK1, MAP2K1-MAPK1, MTOR-MAPK1, PDK1-GSK3A, STMN1-MRE11, RPS6-MTOR, MSH6-MSH2
OV	86	PEA15,GSK3A,RPS6KB1,RBM15,MAP2K1,ANXA7,DIRAS3,NRAS,MAPK1,MAPK9,NDRG1,TSC2,PRDX1,MYC,ESR1,PGR,RAB11A,XRCC5,RAD50,ETS1,FOXO3,BCL2L11,XBP1,CDH1,MAPK8,ERBB3,COL6A1,MYH11,SCD,CCNB1,CCNE1,RB1,CHEK2,PIK3R1,CDKN1B,FOXM1,HSPA1A,ERBB2,SHC1,SRC,NF2,RPS6KA1,YBX1,RPTOR,CDKN1A,MYH9,KDR,MAPK14,PRKCA,MRE11,SMAD1,PDCD4,RPS6,RICTOR,PREX1,STAT5A,YAP1,MSH6,YWHAZ,EIF4EBP1,TP53BP1,ARAF,ACVRL1,AKT1,PRKAA1,AR,ATM,BRAF,B…	PEA15-YWHAZ, GSK3A-EIF4EBP1, RPS6KB1-EIF4EBP1, RBM15-TP53BP1, MAP2K1-ARAF, ANXA7-ACVRL1, DIRAS3-ACVRL1, NRAS-ACVRL1, MAPK1-AKT1, MAPK9-AKT1, NDRG1-AKT1, TSC2-AKT1, NDRG1-PRKAA1, PRDX1-ANXA7, MYC-AR, ESR1-AR, PGR-AR, NRAS-DIRAS3, RAB11A-DIRAS3, XRCC5-ATM, RAD50-ATM, ETS1-BRAF, FOXO3-BAK1, BCL2L11-BCL2L1, XBP1-BECN1, CDH1-CTNNB1, MAPK8-JUN, ERBB3-MYC, TSC2-RAF1, COL6A1-CAV1, MYH11-CAV1, SCD-PECAM1,…
PRAD	18	ACACA,MTOR,SRC,YAP1,TIGAR,FOXM1,MAP2K1,PDK1,MAPK8,TGM2,RPS6KB1,RICTOR,STAT3,SHC1,TSC2,YBX1,EIF4EBP1,BAP1,CDK1,CCNB1,PARK7,EIF4E,MAPK1,G6PD,ERBB2,MYH11,PDCD4,AKT1S1,RPS6	ACACA-EIF4EBP1, MTOR-EIF4EBP1, SRC-EIF4EBP1, YAP1-BAP1, TIGAR-CDK1, FOXM1-CCNB1, MAP2K1-PARK7, PDK1-EIF4E, MAPK8-MAPK1, MAP2K1-MAPK1, TGM2-G6PD, RPS6KB1-ERBB2, RICTOR-MYH11, STAT3-RPS6KB1, SHC1-PDCD4, TSC2-AKT1S1, STAT3-RPS6, YBX1-RPS6
READ	19	EIF4E,FOXO3,CHEK1,GSK3A,NDRG1,SRC,TSC2,KIT,ERBB3,LCK,AKT1S1,RICTOR,RPS6,PTEN,PRKCD,YBX1,SRSF1,EIF4EBP1,AKT1,BCL2,EEF2K,GAPDH,ERBB2,MYH11,RPS6KA1,PIK3R1,PRKCA,SCD	EIF4E-EIF4EBP1, FOXO3-EIF4EBP1, CHEK1-AKT1, GSK3A-AKT1, NDRG1-AKT1, SRC-AKT1, TSC2-AKT1, KIT-BCL2, ERBB3-EEF2K, LCK-GAPDH, AKT1S1-GSK3A, SRC-GSK3A, ERBB3-ERBB2, RICTOR-MYH11, RPS6-RPS6KA1, PTEN-PIK3R1, PRKCD-PRKCA, YBX1-RPS6, SRSF1-SCD
SKCM	17	RPS6,ESR1,CDH1,MAPK8,ERBB3,FOXM1,PEA15,GAPDH,PXN,SMAD4,SYK,RPTOR,PRKCD,COPS5,MSH6,EIF4EBP1,AR,CTNNB1,JUN,CHEK2,CCNB1,EEF2,EGFR,GAB2,ERBB2,NRG1,LCK,MTOR,CDH2,PRKCA,SHC1,MSH2	RPS6-EIF4EBP1, ESR1-AR, CDH1-CTNNB1, MAPK8-JUN, ERBB3-CHEK2, FOXM1-CCNB1, PEA15-EEF2, GAPDH-EGFR, PXN-GAB2, ERBB3-ERBB2, SMAD4-NRG1, SYK-LCK, RPTOR-MTOR, PEA15-CDH2, PRKCD-PRKCA, COPS5-SHC1, MSH6-MSH2
STAD	57	NRAS,RPS6KB1,GSK3A,PCNA,TSC2,BRCA2,NDRG1,PARK7,NFKB1,EIF4G1,CDH1,ESR1,CHEK2,PRDX1,TIGAR,EEF2K,PGR,CCNE1,FOXM1,CDH2,PEA15,ERBB2,RICTOR,RPS6,SHC1,MAP2K1,STAT5A,SRC,RAD51,IRS1,MYH9,MAPK14,TSC1,PXN,PREX1,PRKCD,RBM15,SRSF1,MSH6,YWHAE,YWHAZ,EIF4EBP1,TP53BP1,ACVRL1,AKT1,ANXA7,BAD,BAP1,CTNNB1,JUN,RAF1,CASP7,CDK1,CHEK1,COL6A1,CCNB1,CCND1,EEF2,EGFR,EIF4E,MAPK1,ETS1,FOXO3,GAPDH,GATA3,MTOR,MYH11,PIK3R1,PRKCA…	NRAS-YWHAE, RPS6KB1-YWHAZ, GSK3A-EIF4EBP1, PCNA-EIF4EBP1, TSC2-TP53BP1, BRCA2-ACVRL1, GSK3A-AKT1, NDRG1-AKT1, TSC2-AKT1, PARK7-ANXA7, NFKB1-BAD, EIF4G1-BAP1, CDH1-CTNNB1, ESR1-BRCA2, PARK7-JUN, CHEK2-RAF1, PRDX1-CASP7, TIGAR-CDK1, EEF2K-CHEK1, NFKB1-CHEK1, PGR-COL6A1, CCNE1-CCNB1, FOXM1-CCNB1, CDH2-CCND1, PEA15-EEF2, ERBB2-EGFR, RICTOR-EGFR, RPS6-EGFR, SHC1-EGFR, MAP2K1-EIF4E, STAT5A-EIF4G1, MAP2…
THCA	3	GSK3A,MAP2K1,SRC,EIF4EBP1,MAPK1,ERBB2	GSK3A-EIF4EBP1, MAP2K1-MAPK1, SRC-ERBB2
UCEC	69	EIF4E,RB1,BRAF,ESR1,GSK3A,TP53,PIK3CA,PTEN,TSC2,SHC1,COPS5,ERBB3,NFKB1,CCNE2,EGFR,SMAD3,CDH2,COL6A1,CDH1,MAPK9,MAPK8,HSPA1A,LCK,ETS1,XBP1,CCNB1,CDKN1A,CCNE1,FASN,FOXM1,PCNA,CDKN1B,EIF4G1,ERBB2,SRC,MAP2K1,GAB2,FN1,PGR,MAPK14,RPS6KA1,PEA15,PRDX1,AKT1S1,RPS6,RPTOR,RICTOR,YBX1,STMN1,MSH6,EIF4EBP1,TP53BP1,AKT1,AR,DIRAS3,BAD,BAK1,BCL2L1,BECN1,CTNNB1,JUN,MYC,CASP7,MS4A1,CDK1,CCND1,EEF2K,MAPK1,G6PD,MTOR,…	EIF4E-EIF4EBP1, RB1-EIF4EBP1, BRAF-TP53BP1, ESR1-AKT1, GSK3A-AKT1, TP53-AKT1, PIK3CA-AKT1, PTEN-AKT1, TSC2-AKT1, ESR1-AR, SHC1-DIRAS3, COPS5-DIRAS3, ERBB3-BRAF, NFKB1-BAD, CCNE2-BAK1, EGFR-BAK1, SMAD3-BAK1, CDH2-BCL2L1, COL6A1-BECN1, CDH1-CTNNB1, MAPK9-CTNNB1, MAPK8-JUN, HSPA1A-MYC, LCK-CASP7, ETS1-MS4A1, XBP1-MS4A1, CCNB1-CDK1, CDKN1A-CDK1, RB1-COL6A1, TSC2-COL6A1, CCNE1-CCNB1, FASN-CCNB1, FOXM1…

## Sheet: ALL.CANCERS
INBIA			PERA
GSK3A	YWHAZ		GSK3A	AKT1
ACACA	EIF4EBP1		RICTOR	AKT1
PRKAA1	EIF4EBP1		TSC2	AKT1
CHEK2	EIF4EBP1		EIF4G1	BRAF
CCNB1	EIF4EBP1		ERBB2	EGFR
EIF4E	EIF4EBP1		SHC1	EGFR
MAPK1	EIF4EBP1		GSK3A	MAPK1
GSK3A	EIF4EBP1		MAP2K1	MAPK1
ERBB2	EIF4EBP1		TSC2	GSK3A
NDRG1	EIF4EBP1		PRRT2	RPS6KA1
NFKB1	EIF4EBP1		TSC2	RICTOR
RPS6KB1	EIF4EBP1		YBX1	RPS6
PDCD4	EIF4EBP1
RB1	EIF4EBP1
RPS6	EIF4EBP1
SRC	EIF4EBP1
YAP1	EIF4EBP1
XRCC5	TP53BP1
PRKAA1	ACACA
FASN	ACACA
RPS6	ACACA
YAP1	ACACA
PRKAA1	AKT1
MAPK1	AKT1
GSK3A	AKT1
MAP2K1	AKT1
NDRG1	AKT1
NFKB1	AKT1
CDKN1B	AKT1
RPS6KB1	AKT1
RICTOR	AKT1
RPS6	AKT1
TSC2	AKT1
YAP1	AKT1
GSK3A	PRKAA1
TSC2	PRKAA1
YAP1	BAD
EIF4G1	BRAF
EGFR	CAV1
MAPK1	RAF1
MAPK1	EGFR
ERBB2	EGFR
RPS6	EGFR
SHC1	EGFR
SRC	EGFR
GSK3A	MAPK1
ERBB2	MAPK1
XRCC5	MAPK1
MAP2K1	MAPK1
MTOR	MAPK1
RPS6KA1	MAPK1
RPS6	MAPK1
SRC	MAPK1
MTOR	GSK3A
MAPK14	GSK3A
AKT1S1	GSK3A
RPS6	GSK3A
SRC	GSK3A
TSC2	GSK3A
YAP1	GSK3A
RPS6	ERBB2
SRC	ERBB2
RPS6	MAP2K1
RICTOR	MYH11
SRC	NDRG1
MAPK14	NFKB1
SRC	NFKB1
TSC2	NFKB1
PDCD4	MAPK14
RPS6	MAPK14
SRC	SQSTM1
RPS6	RPS6KB1
YAP1	RPS6KB1
RPS6	PDCD4
SRC	PDCD4
SRC	RB1
TSC2	RICTOR
SRC	RPS6
YAP1	RPS6
YBX1	RPS6
STAT3	SRC
SYK	SRC
TSC2	SRC
