# Supplementary material for: INBIA: a boosting methodology for proteomic network inference
Source: BMC Bioinformatics. 2018 Jul 9;19(Suppl 7):188. doi: 10.1186/s12859-018-2183-5 (PMC6069689; doi:10.1186/s12859-018-2183-5)
Supplement: Supplementary file 5 — Genes present in OncoPanel that overlap with TCPA, INBIA consensus network and INBIA cancer-specific best PPI networks. (XLSX 18.3 kb) [file 12859_2018_2183_MOESM5_ESM.xlsx]

## Sheet: TCPA.OncoPanel Overlap
AKT1
AR
ARAF
ARID1A
ATM
BAP1
BCL2
BCL2L1
CTNNB1
BRAF
BRCA2
CDK1
CHEK2
KIT
MET
MYC
RAF1
CCND1
CCNE1
CDH1
EGFR
ESR1
MAPK1
GATA3
ERBB2
ERBB3
STK11
MAP2K1
MSH2
MSH6
MTOR
NF2
NOTCH1
NRAS
CDKN1A
CDKN1B
TP53
PIK3CA
PIK3R1
PTEN
RB1
SMAD4
SRC
STAT3
SYK
TSC1
TSC2
KDR
VHL

## Sheet: INBIACore.Oncopanel Overlap
CHEK2
MAPK1
ERBB2
RB1
SRC
MAP2K1
CDKN1B
TSC2
EGFR
MTOR
STAT3
SYK
AKT1
BRAF
RAF1

## Sheet: INIBACancer.Oncopanel Overlap
tissue	overlap	length
OV	MAP2K1,NRAS,MAPK1,TSC2,MYC,ESR1,CDH1,ERBB3,CCNE1,RB1,CHEK2,PIK3R1,CDKN1B,ERBB2,SRC,NF2,CDKN1A,KDR,MSH6,ARAF,AKT1,AR,ATM,BRAF,BCL2L1,CTNNB1,RAF1,CDK1,CCND1,EGFR,MTOR,PIK3CA,MSH2	33
BRCA	NRAS,BAP1,TSC2,MAPK1,MTOR,CDKN1B,CDH1,CHEK2,SRC,TP53,ERBB2,ERBB3,GATA3,MAP2K1,CDKN1A,NF2,PIK3R1,SYK,MSH6,AKT1,BRAF,BCL2,CTNNB1,MET,MYC,EGFR,ESR1,MSH2	28
UCEC	RB1,BRAF,ESR1,TP53,PIK3CA,PTEN,TSC2,ERBB3,EGFR,CDH1,CDKN1A,CCNE1,CDKN1B,ERBB2,SRC,MAP2K1,MSH6,AKT1,AR,BCL2L1,CTNNB1,MYC,CDK1,CCND1,MAPK1,MTOR,MSH2	27
STAD	NRAS,TSC2,BRCA2,CDH1,ESR1,CHEK2,CCNE1,ERBB2,MAP2K1,SRC,TSC1,MSH6,AKT1,BAP1,CTNNB1,RAF1,CDK1,CCND1,EGFR,MAPK1,GATA3,MTOR,PIK3R1,PTEN,SYK,MSH2	26
KIRC	MAPK1,PTEN,TSC2,BRCA2,CDKN1B,TP53,ERBB3,ERBB2,MAP2K1,SRC,CDKN1A,MTOR,PIK3R1,SYK,MSH6,AKT1,ATM,BCL2,KIT,MET,MYC,RAF1,EGFR,MSH2	24
COAD	AKT1,RB1,SRC,TSC2,CHEK2,CDH1,ERBB2,MAP2K1,PTEN,MSH6,ARID1A,BAP1,CTNNB1,EGFR,ESR1,MAPK1,MTOR,NRAS,CDKN1A,PIK3R1,MSH2	21
LUAD	AKT1,ATM,BRAF,TSC2,CDH1,MAP2K1,CDKN1B,ERBB2,SRC,MSH6,CTNNB1,MYC,RAF1,EGFR,MAPK1,MTOR,MSH2	17
LGG	TSC2,MAP2K1,ESR1,ERBB2,RB1,MSH6,AKT1,ATM,BRAF,CDK1,CCND1,EGFR,MAPK1,GATA3,MTOR,MSH2	16
GBM	CHEK2,RB1,SMAD4,ERBB2,MAP2K1,CDKN1A,MSH2,TSC2,PTEN,CDK1,EGFR,MAPK1,MTOR,PIK3R1	14
HNSC	CDK1,TSC2,MSH6,PIK3CA,MAPK1,ERBB2,MAP2K1,SRC,AKT1,BAP1,BCL2,RAF1,EGFR,MSH2	14
SKCM	ESR1,CDH1,ERBB3,SMAD4,SYK,MSH6,AR,CTNNB1,CHEK2,EGFR,ERBB2,MTOR,MSH2	13
LUSC	MAPK1,CTNNB1,ERBB3,MAP2K1,MTOR,MSH6,AKT1,BRAF,BCL2,MSH2	10
BLCA	SRC,MAPK1,MTOR,MAP2K1,MSH6,AKT1,BCL2,EGFR,MSH2	9
PRAD	MTOR,SRC,MAP2K1,STAT3,TSC2,BAP1,CDK1,MAPK1,ERBB2	9
READ	SRC,TSC2,KIT,ERBB3,PTEN,AKT1,BCL2,ERBB2,PIK3R1	9
THCA	MAP2K1,SRC,MAPK1,ERBB2	4
