# Supplementary material for: INBIA: a boosting methodology for proteomic network inference
Source: BMC Bioinformatics. 2018 Jul 9;19(Suppl 7):188. doi: 10.1186/s12859-018-2183-5 (PMC6069689; doi:10.1186/s12859-018-2183-5)
Supplement: Supplementary file 6 — Minimum dominating set and corresponding collective influence measure as computed within each cancer’s best method network for INBIA and PERA. (XLSX 49 kb) [file 12859_2018_2183_MOESM6_ESM.xlsx]

## Sheet: MDS.CI.ranks
	IREF			PERA
	BLCA				BLCA
gene.symbol	rank	ci		gene.symbol	rank	ci
EGFR	2	44382		AKT1	1	4698
YWHAZ	7	28375		MAPK1	7	2552
YWHAE	9	20995		CDK1	8	2475
SMAD3	15	18190		PXN	12	1944
RPS6KB1	20	17216		STAT3	13	1896
RPS6KA1	22	17072		LCK	17	1379
BCL2	23	16688		ESR1	30	620
COPS5	25	15450		RPTOR	31	576
RB1	30	14053		SYK	32	546
MSH2	34	12780		PRKAA1	33	528
PTEN	35	12732		YWHAB	36	453
CCND1	58	8104		PRKCA	42	345
ATM	66	7029		NFKB1	43	322
LCK	69	5852		RPS6	46	206
MYH9	79	4190		ANXA1	47	165
STMN1	83	3490		CAV1	48	165
CCNB1	88	3145		GAB2	50	164
KDR	95	2596		BRAF	52	123
GSK3A	97	2481		NRG1	54	96
AKT1S1	103	2016		CCNE2	61	49
PEA15	104	1744		CCND1	62	29
NDRG1	107	1386		BCL2L1	63	27
CCNE1	111	1308		MAPK8	64	27
KIT	113	1246		BCL2L11	65	24
NFKB1	114	1200		CHEK2	66	21
BAX	116	1158		NOTCH1	67	9
NF2	118	1086		FN1	68	0
BID	121	704		EIF4G1	73	0
PREX1	122	597		BRCA2	75	0
CDH2	124	510		ARID1A	76	0
CDH3	127	473		MAPK9	78	0
BIRC2	128	368		G6PD	79	0
DIRAS3	129	329		GAPDH	83	0
XRCC1	130	205		PRRT2	84	0
COL6A1	131	0		CDH2	88	0
EIF4G1	133	0		EIF4E	90	0
ACVRL1	134	0		MET	91	0
RBM15	138	0		TFRC	94	0
XBP1	139	0
GATA3	140	0
	BRCA				BRCA
gene.symbol	rank	ci		gene.symbol	rank	ci
AKT1	1	22644		AKT1	1	8502
MAPK1	5	14275		MAPK1	3	7797
CTNNB1	6	12537		CTNNB1	6	4710
TP53	8	8891		STAT5A	11	3355
FN1	11	6432		CAV1	21	1518
SYK	19	4890		AR	44	484
HSPA1A	29	3573		SHC1	45	482
CCNB1	35	3048		FOXM1	47	456
PRKAA1	53	1860		CDK1	50	348
MSH6	68	1272		CCND1	54	230
EEF2K	78	837		SMAD3	55	230
ATM	90	572		BAX	56	226
CASP7	91	518		PRKAA1	57	218
CCNE1	92	454		CDH2	58	210
PDK1	94	434		RPS6	62	198
PGR	95	410		PXN	64	165
SRSF1	102	364		NOTCH1	66	156
KIT	104	320		CHEK2	67	105
SMAD1	106	269		PCNA	69	92
G6PD	107	256		KIT	71	46
STMN1	110	88		BRCA2	73	16
XRCC1	111	64		ATM	74	5
BRCA2	112	0		ANXA1	76	0
CCND1	113	0		PIK3CA	78	0
ANXA7	114	0		PECAM1	79	0
DIRAS3	115	0		GAPDH	81	0
ASNS	116	0		IRS1	84	0
EIF4G1	117	0		EEF2K	85	0
COL6A1	119	0		SERPINE1	86	0
EIF4E	120	0		CCNE1	88	0
RAB11A	123	0		EIF4E	90	0
PDCD4	125	0		NRAS	91	0
BID	127	0		BID	94	0
SCD	128	0		TFRC	96	0
RBM15	129	0
XBP1	130	0
NRG1	132	0
	COAD				COAD
gene.symbol	rank	ci		gene.symbol	rank	ci
AKT1	1	47128		AKT1	1	8840
MAPK1	4	32160		MAPK1	3	7182
FN1	10	21846		MAPK14	6	3322
PRKCA	27	13312		MTOR	8	2475
YWHAB	28	13260		ERBB2	22	1757
ERBB2	32	11592		CDKN1A	24	1568
PXN	34	11484		AR	35	868
SQSTM1	36	11424		KIT	40	738
COPS5	38	11352		NRAS	46	597
ATM	39	11200		FN1	47	555
CCND1	45	9680		PTEN	50	489
MSH2	49	8800		PRKCD	51	474
PRKAA1	68	5824		CCNB1	52	456
BCL2L1	69	5488		MAPK8	54	414
FOXM1	74	4656		PRKAA1	57	336
MAPK9	75	4650		CHEK2	63	220
MET	78	4464		NRG1	65	207
ARID1A	95	2436		MAPK9	67	190
NDRG1	98	1839		DVL3	71	133
TFRC	99	1798		BID	73	118
NFKB1	101	1614		CCNE2	74	102
PECAM1	108	1236		ATM	75	100
WWTR1	110	1178		RPS6	76	95
CCNE1	113	1068		BCL2L1	77	59
CASP7	115	1011		GATA3	80	34
PDK1	120	643		CCND1	81	33
BECN1	121	632		CAV1	83	28
ANXA7	123	566		EIF4G1	86	0
PARK7	125	460		ARID1A	87	0
CCNE2	128	345		ANXA1	88	0
BAP1	129	325		BRCA2	89	0
XRCC1	130	269		NFKB1	90	0
BID	131	55		PRRT2	98	0
RAB25	132	0		WWTR1	100	0
TIGAR	133	0		SQSTM1	101	0
ASNS	134	0
DIRAS3	135	0
COL6A1	136	0
KDR	137	0
RBM15	138	0
CDH2	139	0
GATA3	140	0
PDCD4	141	0
XBP1	142	0
	GBM				GBM
gene.symbol	rank	ci		gene.symbol	rank	ci
EGFR	1	13980		AKT1	1	12608
CTNNB1	6	5304		MAPK1	3	11480
MAPK8	14	3660		MAPK14	7	5656
RPS6	25	2700		FN1	25	2345
EIF4EBP1	29	2364		MAPK8	28	2094
LCK	31	2082		PRKCD	35	1372
YBX1	32	1865		CDK1	36	1368
CCNB1	33	1813		PRKAA1	44	985
RPS6KA1	34	1730		PCNA	45	932
FOXO3	36	1548		CDH3	49	672
TSC2	38	1464		KDR	50	640
MSH6	39	1390		CDKN1A	54	584
GSK3A	40	1384		CDH2	55	580
BRAF	46	1125		ANXA1	58	326
PIK3CA	51	1008		SHC1	59	326
CDKN1A	58	798		RPS6	65	264
PEA15	60	720		KIT	70	229
SMAD4	62	678		XBP1	71	198
NF2	65	620		WWTR1	73	37
BCL2	70	424		ATM	75	2
NFKB1	72	312		EIF4G1	78	0
AKT1S1	74	266		HSPA1A	80	0
EIF4G1	77	236		BAK1	82	0
PGR	78	223		ACVRL1	84	0
EEF2K	79	193		MYC	85	0
RAD50	81	150		CHEK2	86	0
PREX1	83	128		YWHAE	87	0
MYH9	84	119		GATA3	88	0
CHEK1	85	103		FOXM1	89	0
FASN	86	98		MYH11	91	0
ARAF	88	85		NOTCH1	92	0
SRSF1	92	0		PTEN	93	0
KIT	93	0		TFRC	94	0
BAK1	94	0		PGR	96	0
TUBA1B	96	0		CDH1	100	0
PECAM1	97	0		ETS1	101	0
BAP1	99	0		MAPK9	103	0
BRCA2	103	0		SMAD1	104	0
VHL	104	0
IRS1	106	0
SMAD1	107	0
PRDX1	108	0
BCL2L1	109	0
G6PD	112	0
STK11	115	0
	HNSC				HNSC
gene.symbol	rank	ci		gene.symbol	rank	ci
AKT1	1	11340		SRC	1	12492
MAPK1	5	6885		TP53	8	4116
FN1	7	5850		YWHAZ	9	3872
PRKCA	11	3546		TSC2	15	2520
ERBB2	25	1818		MYC	18	2240
ATM	32	1308		EIF4EBP1	31	1208
MAPK8	33	1244		BCL2	32	1196
CCNB1	35	1155		JUN	40	960
CDK1	48	810		RPS6KB1	41	891
PRKAA1	50	741		IRS1	45	606
KDR	51	654		RAF1	47	594
ERBB3	57	560		FOXM1	52	378
AR	60	496		ANXA1	61	231
VHL	64	447		FOXO3	64	197
COPS5	65	430		CCNE2	70	154
NDRG1	66	358		MYH11	73	110
CHEK1	72	246		ACACA	78	0
STK11	77	181		TP53BP1	80	0
CASP7	79	162		PRKCD	81	0
TUBA1B	80	149		ACVRL1	82	0
CCNE2	81	129		AKT1S1	83	0
CDH3	82	120		YBX1	84	0
YWHAB	83	116		PDCD4	85	0
EEF2	84	115		WWTR1	86	0
MSH6	85	83		VHL	87	0
NFKB1	86	61		PEA15	88	0
CHEK2	91	0		PTEN	89	0
BCL2L1	92	0		RAD51	91	0
BAP1	93	0		EEF2K	93	0
ARID1A	94	0		NOTCH1	94	0
G6PD	96	0
ANXA7	97	0
ASNS	98	0
ACVRL1	99	0
FOXO3	101	0
BID	102	0
PDK1	104	0
MYH11	105	0
NRG1	106	0
SCD	108	0
NOTCH1	114	0
	KIRC				KIRC
gene.symbol	rank	ci		gene.symbol	rank	ci
AKT1	1	10475		SRC	1	9296
MAPK1	3	9361		YWHAZ	5	3876
FN1	8	4584		MTOR	13	2394
MAPK8	10	3916		PIK3R1	16	2107
SQSTM1	11	3872		PIK3CA	25	1470
RPS6	13	3680		JUN	35	1000
ERBB2	22	2394		GAB2	41	562
PRKCA	38	1430		NRG1	42	538
HSPA1A	40	1328		SHC1	43	504
PRDX1	41	1260		DVL3	45	438
PRKAA1	54	759		RPS6	48	324
PIK3CA	59	684		PRKAA1	50	290
MET	60	669		PRKCD	51	286
YWHAB	67	482		TUBA1B	52	280
KIT	71	398		TP53	54	276
EIF4G1	72	366		BAD	57	247
ATM	74	358		SMAD4	60	236
NFKB1	75	350		YBX1	62	201
SRSF1	83	159		PGR	63	193
NDRG1	87	121		BCL2L1	65	177
BCL2L11	90	101		YWHAB	66	176
BAX	92	66		RPTOR	68	168
BID	93	66		COL6A1	71	84
RAB11A	94	65		BID	73	83
PARK7	95	0		SERPINE1	74	70
ARAF	96	0		CHEK2	76	30
MSH2	97	0		ETS1	80	0
MYH11	98	0		TP53BP1	84	0
ITGA2	99	0		PECAM1	85	0
YWHAE	100	0		ITGA2	87	0
MAPK9	101	0		BCL2L11	88	0
CHEK2	102	0		FOXM1	89	0
PRKCD	103	0		CDKN1A	91	0
PECAM1	104	0		PCNA	93	0
FOXM1	106	0		CCNE1	94	0
CHEK1	108	0		RB1	95	0
NRG1	109	0		XBP1	96	0
CDH3	111	0
DVL3	112	0
CDKN1A	114	0
TFRC	116	0
PDK1	117	0
NRAS	119	0
CCNE1	120	0
ERRFI1	121	0
	LGG				LGG
gene.symbol	rank	ci		gene.symbol	rank	ci
AKT1	1	13079		AKT1	1	12673
MAPK1	3	10512		MAPK1	2	12208
HSPA1A	16	3530		PIK3CA	15	4433
SYK	17	3530		CCND1	20	3465
PRKCA	25	2124		MAPK8	23	2976
PXN	30	1988		MAPK14	25	2779
MAPK9	34	1860		CAV1	32	1974
RPS6	36	1692		TP53	42	1220
PRKAA1	39	1368		CDK1	47	964
CCNB1	41	1345		ANXA1	50	666
ANXA1	49	1107		CCNE1	53	604
PRDX1	59	876		XBP1	58	450
MSH6	65	656		SHC1	62	271
ATM	68	620		FOXO3	65	226
NFKB1	69	579		CDH2	68	221
PRKCD	71	556		EEF2K	69	209
SRSF1	72	522		PRKAA1	70	202
KDR	77	466		DVL3	71	159
EEF2K	78	374		GATA3	72	155
YWHAB	80	278		RPS6	73	111
TFRC	81	256		ATM	76	6
BAD	84	164		BAD	80	0
SMAD1	86	162		SRSF1	81	0
EIF4E	87	148		YWHAE	83	0
YWHAE	91	72		EIF4G1	85	0
BCL2L11	92	70		MYH11	86	0
CDK1	93	69		KDR	89	0
PIK3CA	98	0		BID	90	0
CCNE1	99	0		EIF4E	91	0
BAX	101	0		WWTR1	94	0
FASN	102	0		TFRC	97	0
MET	103	0		SMAD4	98	0
CDH2	104	0		NRAS	100	0
PDK1	105	0		XRCC1	101	0
BID	108	0		PCNA	102	0
DVL3	109	0		PTEN	104	0
SMAD4	110	0
WWTR1	112	0
EIF4G1	113	0
STMN1	114	0
	LUAD				LUAD
gene.symbol	rank	ci		gene.symbol	rank	ci
AKT1	1	52888		AKT1	1	5472
MAPK1	5	37984		MAPK1	2	4452
YWHAB	14	21060		PIK3R1	28	498
PRKCA	20	17808		CDH2	30	428
COPS5	30	15735		NRAS	31	420
FN1	32	14625		MAPK9	34	342
ERBB2	36	14252		CHEK2	36	270
SQSTM1	41	13044		PIK3CA	40	162
ATM	43	12922		SYK	41	143
MAPK9	59	8640		WWTR1	42	141
PRKAA1	75	6370		STAT3	43	139
CCND1	77	5676		PRKAA1	44	113
MET	78	5376		BRCA2	45	100
MSH6	80	5166		SMAD4	47	97
FOXM1	81	4884		CCNE2	48	74
NFKB1	86	4245		RPS6KB1	49	73
ANXA1	97	2652		BAX	50	72
TUBA1B	99	2283		CCNB1	52	24
WWTR1	101	2091		BAK1	58	0
EIF4G1	108	1598		FN1	60	0
NDRG1	109	1536		TP53BP1	61	0
PDK1	113	1390		CDH1	64	0
BECN1	117	1172		PRKCD	67	0
PARK7	119	1022		SHC1	68	0
EIF4E	120	998		SMAD1	69	0
CCNE2	122	870		MAPK14	70	0
CASP7	123	738		MAPK8	72	0
BIRC2	125	702
ARID1A	126	615
ARAF	127	523
CDH2	128	487
BAK1	129	425
XRCC1	131	228
TIGAR	132	0
BAP1	133	0
COL6A1	134	0
ACVRL1	135	0
DIRAS3	136	0
ITGA2	137	0
ASNS	138	0
RBM15	139	0
XBP1	140	0
CDH3	141	0
DVL3	142	0
	LUSC				LUSC
gene.symbol	rank	ci		gene.symbol	rank	ci
AKT1	1	50072		AKT1	1	5925
MAPK1	5	33810		MAPK1	3	4050
YWHAB	11	21109		MAPK14	26	393
COPS5	19	16260		ATM	28	360
STAT3	22	15585		CDH1	31	286
XRCC5	27	14434		CHEK2	32	267
PRKCA	34	12624		PCNA	34	240
PRKAA1	53	8766		MAPK8	46	143
SQSTM1	61	7443		NFKB1	47	134
CDK1	65	6936		RPS6KA1	48	129
CHEK2	67	6399		PRKAA1	49	126
MET	79	4896		BAX	51	80
TGM2	83	4370		LCK	57	16
RAD51	93	2645		ESR1	58	9
TFRC	97	2388		ACVRL1	60	0
PRKCD	99	2346		FN1	61	0
TUBA1B	102	2079		MAPK9	63	0
EIF4G1	104	1590		CAV1	64	0
MYH9	105	1416		EIF4G1	65	0
PDK1	106	1358		CDKN1A	67	0
KDR	107	1350		BCL2	68	0
WWTR1	108	1328		BAK1	69	0
KIT	109	1214		CDH3	70	0
ARAF	110	1152		EEF2	72	0
EIF4E	113	794		SHC1	74	0
BIRC2	115	698		TP53	77	0
FASN	116	606		STAT3	80	0
XBP1	117	554		PRKCD	82	0
ANXA7	118	536		SMAD4	83	0
MRE11	119	530		CDK1	84	0
BAK1	120	528		VHL	86	0
ETS1	121	458
ERRFI1	122	450
PARK7	123	400
BAP1	124	349
NRG1	125	273
MS4A1	129	0
TIGAR	130	0
CCNE2	131	0
RAB25	132	0
BECN1	133	0
ASNS	134	0
ACVRL1	135	0
COL6A1	136	0
MYH11	137	0
RAB11A	140	0
CDH3	141	0
RBM15	142	0
CDH2	143	0
G6PD	144	0
	OV				OV
gene.symbol	rank	ci		gene.symbol	rank	ci
MAPK1	1	23902		MAPK1	1	13440
AKT1	3	20940		AKT1	2	10125
SRC	4	16675		MAPK14	6	5796
FN1	9	11438		YWHAZ	8	5031
HSPA1A	10	9750		CCNE1	23	2704
CCNB1	38	4024		CDH1	27	2488
MSH6	55	2470		CAV1	37	1450
PRKAA1	66	1856		PRKAA1	45	948
ATM	67	1782		KIT	53	606
CCNE1	72	1568		CCND1	57	530
CHEK2	74	1500		BAX	58	524
PRDX1	75	1497		MAPK8	59	478
NDRG1	78	1372		FN1	60	460
NFKB1	79	1353		CHEK2	61	375
EIF4E	86	963		GAPDH	64	253
IRS1	90	858		DVL3	66	237
BID	96	652		RPS6	70	216
CASP7	97	618		EEF2K	71	170
KDR	98	576		MYH11	75	63
BAX	99	564		ATM	80	2
MAPK9	105	303		BCL2L1	82	0
ARID1A	106	296		CASP7	85	0
BRCA2	107	287		ANXA1	87	0
PARK7	108	283		ETS1	88	0
ARAF	109	276		PCNA	91	0
MYH11	110	260		SMAD4	94	0
CDH2	111	259		NOTCH1	96	0
PDCD4	114	172		HSPA1A	98	0
TIGAR	117	0		PRDX1	100	0
MRE11	118	0
MET	119	0
COL6A1	120	0
ANXA7	121	0
YWHAE	122	0
BECN1	124	0
SCD	128	0
XRCC1	129	0
NRG1	130	0
CDH3	132	0
	PRAD				PRAD
gene.symbol	rank	ci		gene.symbol	rank	ci
EGFR	1	46326		AKT1	1	8472
TP53	6	28522		MAPK1	2	7502
RPS6KA1	18	16496		PRKCA	7	4017
RPS6KB1	19	16496		MYC	8	3952
SMAD3	24	14520		MAPK14	11	2880
PXN	27	14042		STAT5A	27	1362
MSH2	28	13377		CDK1	32	1150
COPS5	38	10901		PRKAA1	35	885
BCL2	42	10175		MAPK8	39	808
BRAF	48	8892		CDH1	40	792
RB1	50	8586		MAPK9	43	708
CCND1	62	6426		RPS6	46	584
PRKCD	69	5580		CAV1	47	552
GAB2	78	4475		CHEK2	55	456
PIK3CA	82	4110		DVL3	59	380
FASN	89	3396		BID	63	242
AKT1S1	91	2924		EEF2K	67	192
FOXM1	94	2750		CCND1	70	164
KDR	95	2688		PGR	71	125
BCL2L11	99	2289		BRCA2	72	41
NRAS	100	2250		CCNB1	74	32
KIT	102	2205		CCNE2	80	0
PEA15	103	1664		G6PD	81	0
ARAF	104	1629		BAX	82	0
WWTR1	105	1629		GATA3	83	0
PGR	106	1602		CCNE1	84	0
PECAM1	107	1572		ATM	85	0
STMN1	108	1467		SMAD4	92	0
BAP1	113	1282		YAP1	93	0
NF2	118	960		CDH3	94	0
G6PD	119	844		FN1	97	0
EIF4G1	125	606		RPTOR	98	0
XBP1	126	584		HSPA1A	99	0
CCNE2	128	273		XBP1	103	0
PREX1	129	233
MS4A1	130	0
ACVRL1	131	0
TIGAR	133	0
BAK1	135	0
MYH11	137	0
DIRAS3	138	0
RAB11A	139	0
COL6A1	140	0
GATA3	142	0
CDH2	144	0
	READ				READ
gene.symbol	rank	ci		gene.symbol	rank	ci
AKT1	1	47687		MAPK1	1	35416
MAPK1	5	33090		AKT1	2	34632
YWHAZ	6	31680		MYC	13	18200
STAT3	12	19260		STAT3	27	11765
FN1	15	17928		PXN	41	7596
PRKCA	25	13454		CDH2	53	5864
XRCC5	29	13026		CAV1	55	5576
CDK1	37	11160		FOXM1	57	4900
COPS5	44	9856		KIT	58	4704
BCL2L1	59	7146		MAPK9	59	4284
CAV1	65	6412		PCNA	66	3630
STAT5A	67	6237		PRKAA1	68	3384
MET	68	5984		FN1	72	2356
CHEK2	84	3816		KDR	75	1902
ERRFI1	112	1316		BID	76	1872
NRG1	113	1094		PTEN	88	1140
CCNE2	117	834		RPS6	91	924
CASP7	119	654		ARID1A	92	876
SCD	120	630		WWTR1	93	854
PDK1	121	609		ANXA1	96	616
RAD51	122	602		ATM	100	465
BAP1	123	555		PRDX1	101	465
KIT	124	518		XBP1	103	382
ARID1A	125	486		VHL	104	347
ANXA7	126	485		RB1	105	334
PDCD4	129	243		MRE11	112	29
RAD50	131	207		SRSF1	113	0
ACVRL1	133	0		PECAM1	115	0
MRE11	134	0		CASP7	117	0
COL6A1	135	0		G6PD	118	0
TIGAR	136	0		MYH11	120	0
ITGA2	137	0		SQSTM1	121	0
CDH3	138	0
BECN1	139	0
RBM15	140	0
XBP1	141	0
CDH2	143	0
	SKCM				SKCM
gene.symbol	rank	ci		gene.symbol	rank	ci
EGFR	1	49808		AKT1	1	10842
TP53	5	34906		MAPK1	2	9416
CDKN1B	19	16365		MAPK8	31	1770
RB1	22	15495		PIK3CA	35	1485
RPS6KB1	30	13715		PRKCA	36	1362
PXN	33	13429		MAPK14	39	1105
LCK	43	10450		PXN	42	981
RPTOR	45	10030		CHEK2	45	848
JUN	48	8496		BID	46	837
VHL	49	8360		SMAD4	47	795
PIK3CA	53	8016		EIF4G1	49	717
MSH2	56	7632		STK11	54	592
TSC1	72	5688		CDH3	58	502
SMAD1	76	5124		EEF2K	59	444
PGR	80	4600		PCNA	60	420
BAX	86	3647		FN1	62	396
ARAF	89	3530		TSC1	63	334
MYH9	91	3296		BCL2	68	220
EEF2	96	2580		ACVRL1	69	211
EIF4G1	97	2559		NFKB1	70	203
FASN	98	2532		CAV1	72	197
AKT1S1	102	2223		MET	75	124
NF2	103	2145		SYK	79	81
KIT	104	2058		TP53BP1	84	0
WWTR1	106	2007		GATA3	86	0
PEA15	107	1636		XRCC5	88	0
BAP1	111	1460		DVL3	89	0
NFKB1	113	1380		PECAM1	90	0
KDR	114	1365		CDH1	91	0
XBP1	123	636		EIF4E	92	0
PREX1	125	617		CDK1	94	0
DIRAS3	128	410		BCL2L11	95	0
NDRG1	129	381		YAP1	97	0
CDH3	131	322		YBX1	100	0
RAD50	132	320		MAPK9	101	0
G6PD	134	0		PTEN	102	0
CDH2	137	0
GATA3	140	0
RBM15	142	0
DVL3	143	0
	STAD				STAD
gene.symbol	rank	ci		gene.symbol	rank	ci
MAPK1	1	13456		SRC	1	10527
AKT1	2	12339		MYC	4	7011
FN1	8	4628		YWHAZ	16	2744
ERBB2	15	3285		PIK3R1	19	2387
PRKCA	16	3096		FOXO3	20	2130
HSPA1A	17	2936		ESR1	23	1670
ATM	29	2160		RPS6KB1	25	1610
ANXA1	51	1029		EIF4EBP1	29	1276
KDR	54	861		CCNB1	31	1160
BID	58	675		BCL2L1	35	1028
CCNE1	59	660		PRKCD	46	568
CCNB1	62	603		TSC1	47	556
EEF2	67	410		FN1	53	408
SRSF1	68	386		MET	56	306
MET	72	274		KIT	61	254
PRKAA1	74	242		ETS1	63	251
PDK1	76	231		SMAD1	64	251
MAPK9	79	221		IRS1	65	242
EIF4G1	82	194		PRKAA1	66	234
NDRG1	83	190		RPS6KA1	69	226
VHL	87	162		RPTOR	70	222
XRCC1	90	106		ATM	73	144
CASP7	93	66		NRAS	74	129
MRE11	95	59		CCNE2	77	72
G6PD	96	0		MRE11	82	10
BCL2	99	0		MYH11	84	0
MS4A1	100	0		TUBA1B	85	0
PIK3CA	101	0		EEF2	87	0
CDK1	102	0		RB1	90	0
PARK7	103	0		AKT1S1	92	0
YWHAE	104	0		TP53	93	0
ANXA7	106	0		VHL	94	0
SCD	107	0		PEA15	95	0
MYH11	108	0		XBP1	97	0
PDCD4	112	0		XRCC1	98	0
STMN1	113	0		WWTR1	99	0
CDH2	114	0		ITGA2	100	0
NFKB1	116	0		HSPA1A	102	0
SMAD4	118	0
CDH3	119	0
	THCA				THCA
gene.symbol	rank	ci		gene.symbol	rank	ci
EGFR	1	13132		MAPK1	1	11400
ESR1	4	11256		AKT1	3	10556
TP53	7	6592		TP53	14	2817
MAPK8	11	4884		SYK	17	2366
PXN	17	3312		KIT	22	1675
RPS6KB1	20	2968		CDK1	24	1625
ETS1	38	1675		MAPK8	26	1565
BRAF	39	1600		CDH1	28	1450
CDKN1A	42	1548		CAV1	31	1435
KIT	47	1308		PIK3R1	33	1330
RICTOR	48	1308		BAX	45	784
EIF4E	53	1056		CCNE1	46	753
RPS6KA1	54	1048		YWHAE	47	750
BAX	56	905		ANXA1	50	624
SMAD1	60	810		CDH3	56	568
PIK3R1	62	783		SMAD3	61	362
TGM2	63	744		MYC	62	338
BRCA2	72	504		PCNA	69	182
PEA15	75	283		VHL	71	163
FASN	78	259		EIF4E	72	132
RAB11A	84	135		YWHAB	73	101
PCNA	87	111		ATM	76	16
EEF2K	90	59		TP53BP1	77	16
ATM	91	53		MYH11	79	0
TUBA1B	95	0		ACACA	80	0
NDRG1	97	0		G6PD	82	0
COL6A1	98	0		BRCA2	83	0
FOXO3	99	0		CHEK1	84	0
YWHAB	100	0		EEF2	85	0
PRKCD	102	0		ITGA2	86	0
MTOR	103	0		SERPINE1	87	0
MYH11	104	0		EEF2K	91	0
MS4A1	105	0		PGR	92	0
EEF2	107	0		SMAD4	98	0
GSK3A	108	0
TFRC	109	0
CDH2	110	0
KDR	112	0
PREX1	113	0
SMAD4	117	0
G6PD	118	0
XBP1	120	0
GAB2	121	0
CDH3	122	0
	UCEC				UCEC
gene.symbol	rank	ci		gene.symbol	rank	ci
AKT1	1	15213		AKT1	1	6475
MAPK1	4	9020		MAPK1	2	5544
TP53	7	4536		CTNNB1	8	2420
HSPA1A	12	3850		MAPK14	11	2151
RPS6	15	3321		TP53	16	1290
PRKCA	18	3016		STAT5A	22	990
ERBB2	21	2856		PRKCD	43	356
STAT5A	30	2082		MAPK8	44	328
PRKAA1	31	2064		CDK1	45	228
CCNB1	36	1673		ACVRL1	47	194
PXN	40	1395		BRAF	53	144
ATM	43	1295		CCND1	63	70
MSH6	47	1184		CCNE1	64	66
MAPK8	58	828		AR	65	55
CCNE1	60	780		SERPINE1	67	54
ANXA1	69	572		BAX	69	35
SMAD3	70	564		EIF4G1	71	26
PDK1	72	534		MRE11	73	11
KDR	75	488		IRS1	75	3
CASP7	81	282		CCNE2	76	0
GAB2	85	231		GATA3	77	0
EIF4G1	86	224		BCL2	78	0
ARID1A	88	208		PECAM1	79	0
PRDX1	94	95		ATM	81	0
PARK7	97	72		COL6A1	82	0
BCL2L1	98	51		EIF4E	83	0
G6PD	100	0		TFRC	84	0
CCND1	101	0		RAD51	87	0
CCNE2	102	0		XBP1	90	0
SRSF1	103	0		PTEN	93	0
BAP1	104	0		PIK3R1	95	0
STMN1	106	0
MAPK9	107	0
SMAD4	109	0
GATA3	110	0
XBP1	112	0
DVL3	114	0
CDH3	116	0
CDH2	117	0
XRCC1	118	0
PECAM1	120	0

## Sheet: Foglio2
	iref.nodes	iref.edges	pera.nodes	pera.edges
BLCA	142	671	97	205
BRCA	132	405	99	241
COAD	142	657	103	248
GBM	115	310	105	275
HNSC	114	286	94	244
KIRC	121	311	96	234
LGG	114	320	104	294
LUAD	142	703	74	169
LUSC	144	670	87	182
OV	132	451	101	283
PRAD	144	664	103	253
READ	143	658	123	559
SKCM	144	672	102	284
STAD	119	317	102	259
THCA	122	325	100	262
UCEC	120	325	96	205
